# Supplementary material
Source: Springer Nature journal article supplement (https://www.springermedizin.de/resource/supplementary/12986_2011_426_MOESM2_ESM.pdf/25656068)

# Phases of Inflammation and Stress Axes

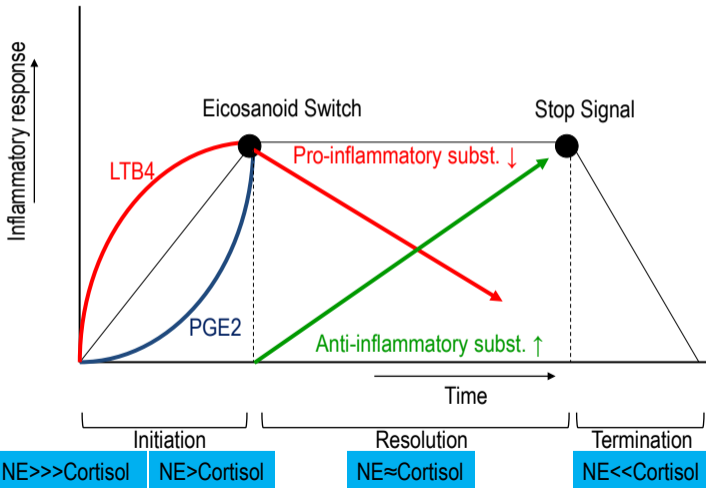

Supplement: MOESM2 [file 25656068]
